# Supplementary material for: Fe3O4@PEG-SO3H rod-like morphology along with the spherical nanoparticles: novel green nanocomposite design, preparation, characterization and catalytic application
Source: Royal Society of Chemistry journal article supplement (doi:10.1039/c6ra24029a), 2016-01-01

# **Fe<sub>3</sub>O<sub>4</sub>@PEG-SO<sub>3</sub>H rod-like morphology along with the spherical nanoparticles: novel green nanocomposite design, preparation, characterization and catalytic application**

Ali Maleki,\* Pedram Zand and Zahra Mohseni

*Catalysts and Organic Synthesis Research Laboratory, Department of Chemistry, Iran*

*University of Science and Technology, Tehran 16846-13114, Iran*

\* Corresponding author. Tel.: +98 21 77240540; fax: +98 21 73021584. *E-mail address:*

[maleki@iust.ac.ir](mailto:maleki@iust.ac.ir) (A. Maleki).

## **<sup>1</sup>H NMR of the product 4j:**

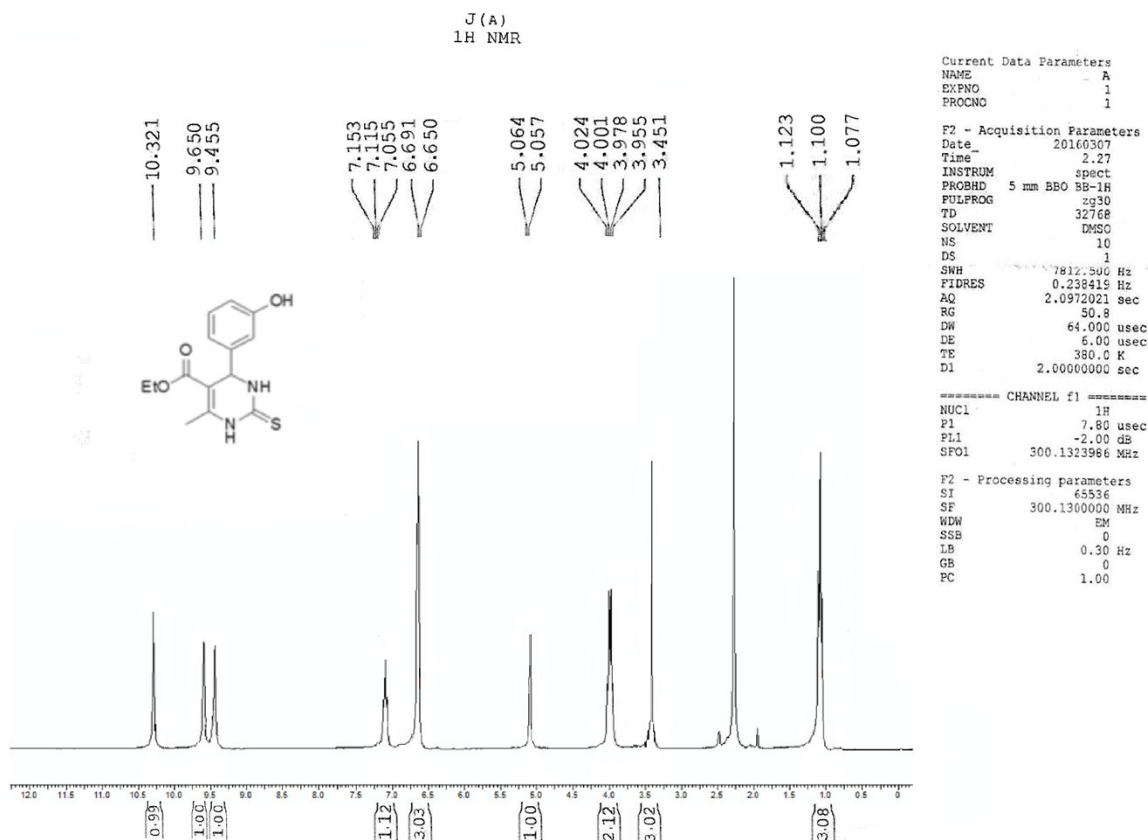

### FT-IR of 4a

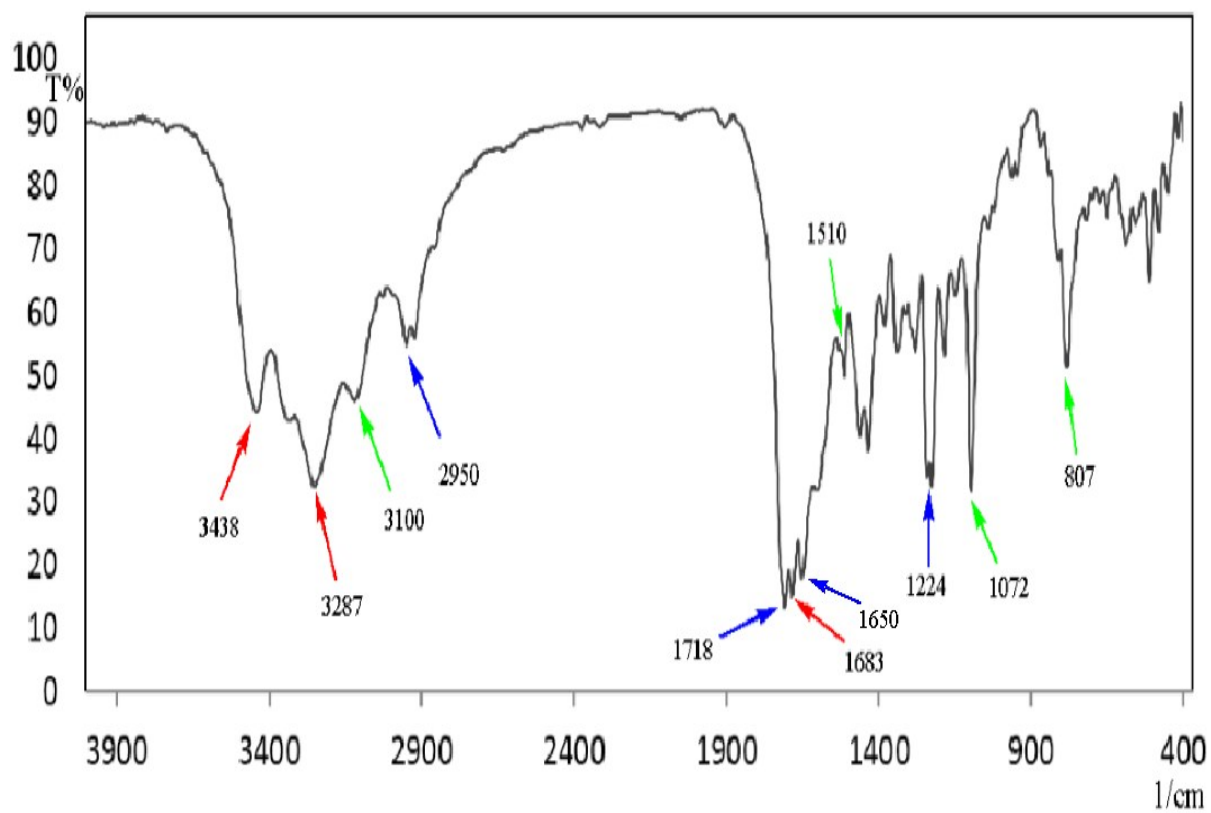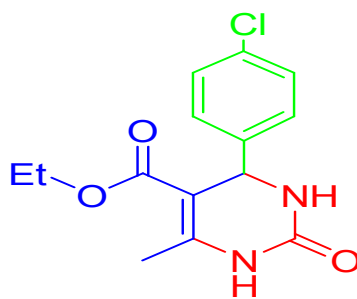

FT-IR of **4b**

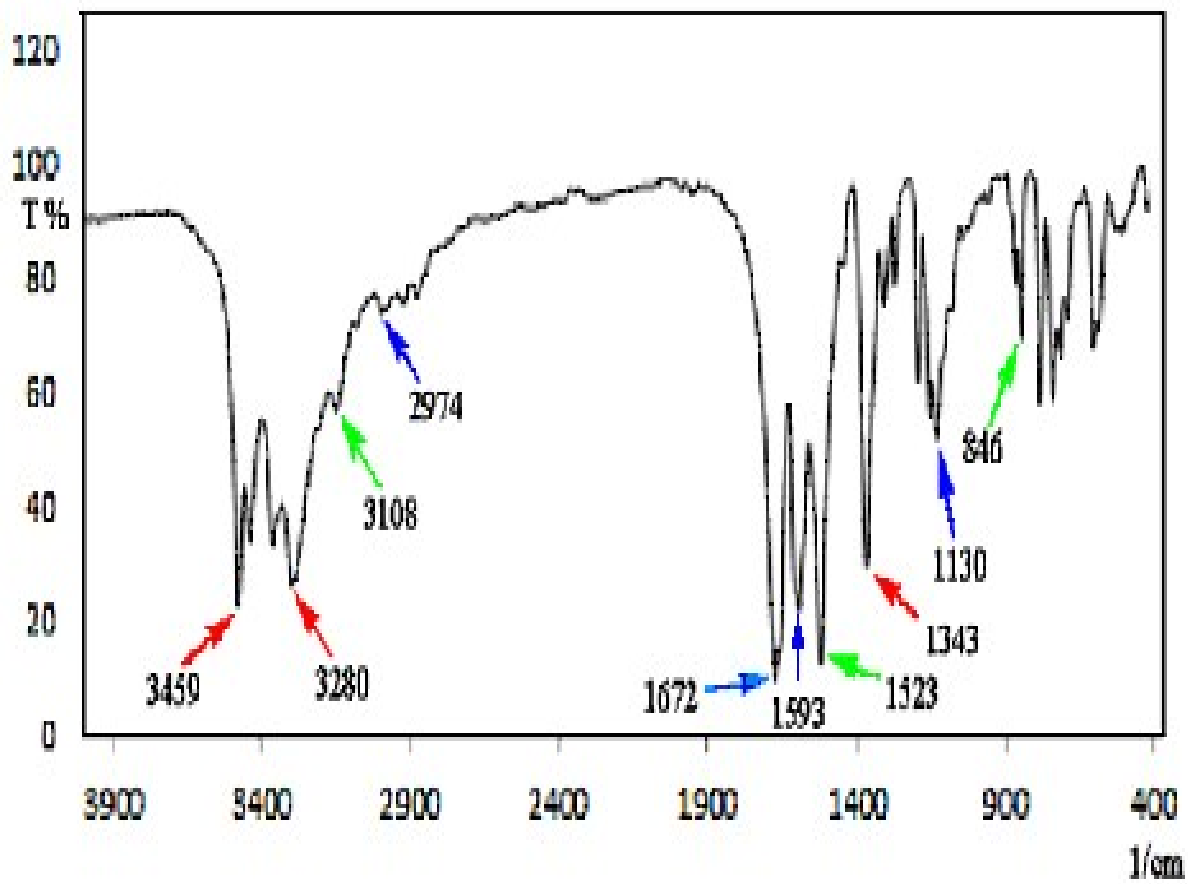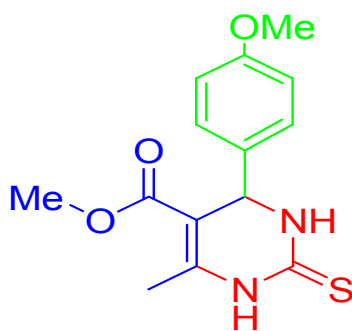

### FT-IR of 4j

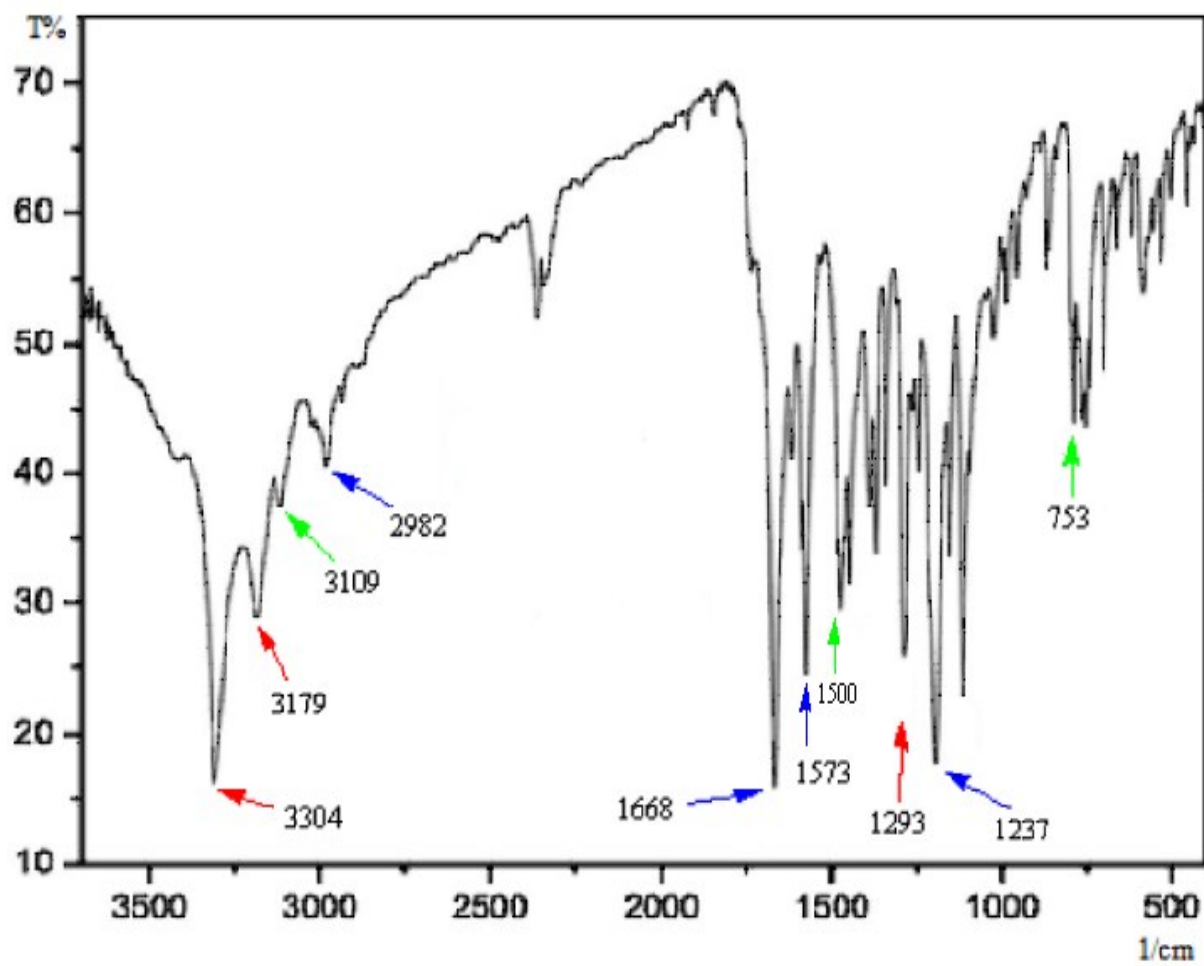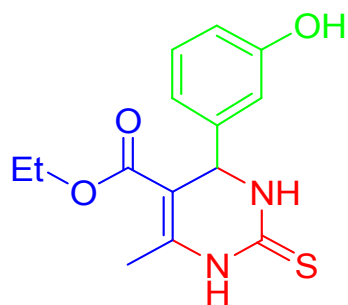

Supplement: c6ra24029a1.pdf [file c6ra24029a1.pdf]
